# Supplementary material for: Multifrequency ESR study of spin-labeled molecules in inclusion compounds with cyclodextrins
Source: Royal Society of Chemistry journal article supplement (doi:10.1039/b903490k), 2009-01-01

*Supplemental material:*

For Fig. 5. Simulations for 5-sasl in  $\gamma$ -CD at 293K (*a*) using different models. Simple anisotropic rotation (*b*) with  $R_{\perp} = 2.5 \cdot 10^7 \text{s}^{-1}$ ;  $R_{\parallel} = 1.7 \cdot 10^8 \text{s}^{-1}$  and MOMD (*c*) with  $R_{\perp} = 1 \cdot 10^8 \text{s}^{-1}$ ;  $R_{\parallel} = 1.7 \cdot 10^8 \text{s}^{-1}$ ,  $C_{20} = 10$

For Fig. 10. Simulations for TEMPOyl- caprylate in  $\beta$ -CD at different temperatures (*a*, experiment) using models of simple anisotropic rotation (*b*) and MOMD (*c*). The simulation parameters are:

260K:  $R_{\perp} = 2.5 \cdot 10^7 \text{s}^{-1}$ ;  $R_{\parallel} = 1 \cdot 10^9 \text{s}^{-1}$  (simple model);  $R_{\perp} = 1.6 \cdot 10^8 \text{s}^{-1}$ ;  $R_{\parallel} = 1 \cdot 10^9 \text{s}^{-1}$ ,  $C_{20} = 8$  (MOMD). 200K:  $R_{\perp} = 1 \cdot 10^7 \text{s}^{-1}$ ;  $R_{\parallel} = 5.6 \cdot 10^8 \text{s}^{-1}$  (simple model);  $R_{\perp} = 1.4 \cdot 10^8 \text{s}^{-1}$ ;  $R_{\parallel} = 5.6 \cdot 10^8 \text{s}^{-1}$ ,  $C_{20} = 10$  (MOMD). 140K:  $R_{\perp} = 4 \cdot 10^6 \text{s}^{-1}$ ;  $R_{\parallel} = 1.7 \cdot 10^8 \text{s}^{-1}$  (simple model);  $R_{\perp} = 1 \cdot 10^8 \text{s}^{-1}$ ;  $R_{\parallel} = 1.7 \cdot 10^8 \text{s}^{-1}$ ,  $C_{20} = 10$ ,  $C_{20} = 5$  (MOMD).

Supplement – simulations for Fig. 5

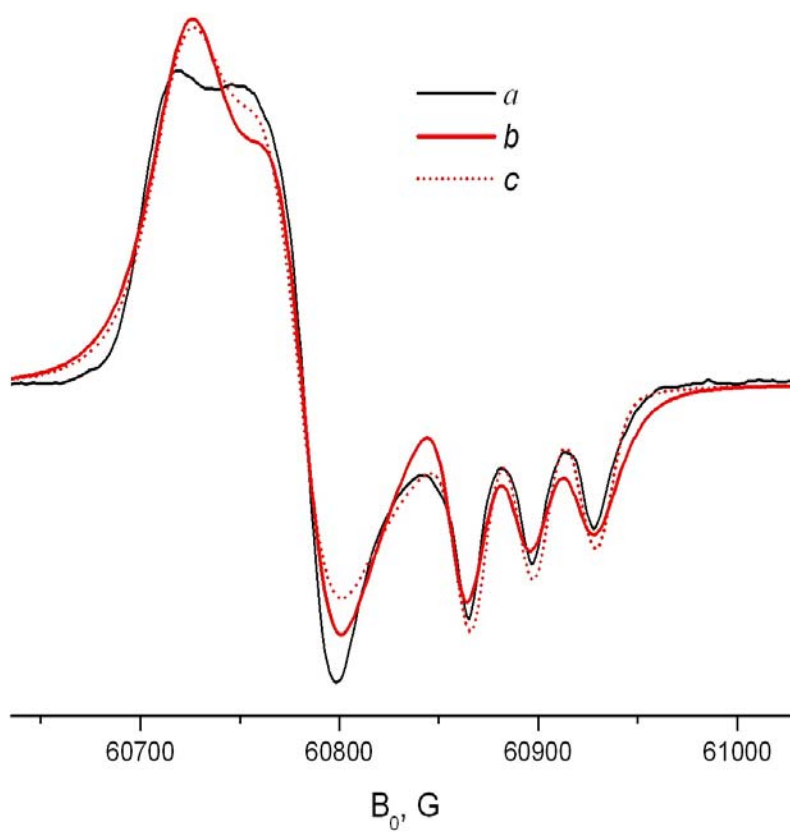

Supplement - simulations for Fig . 10

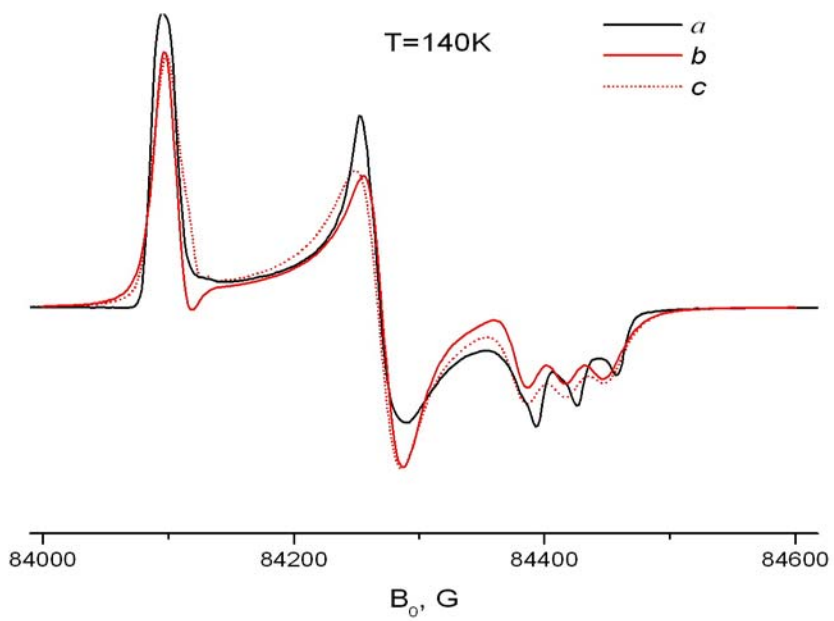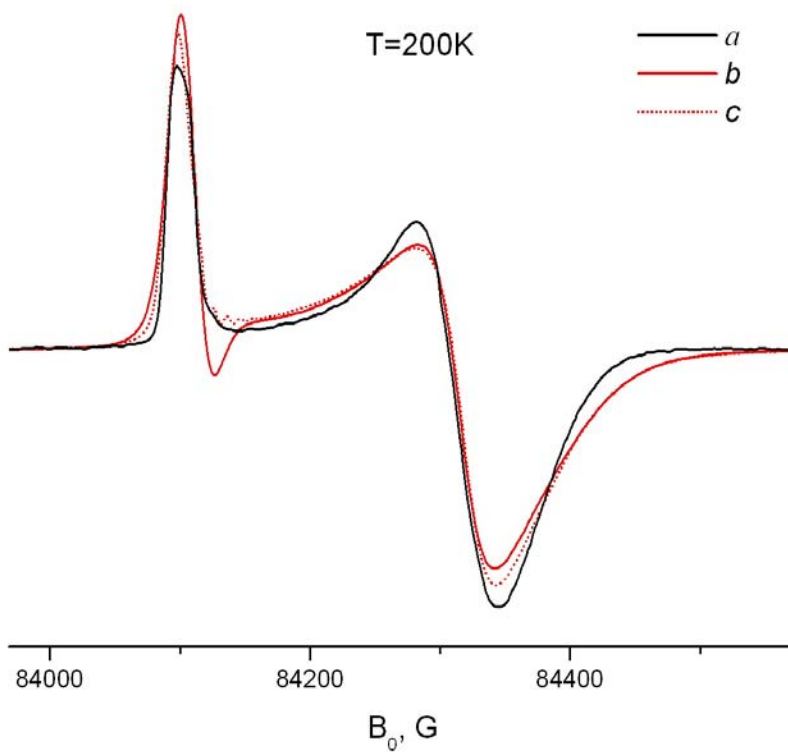

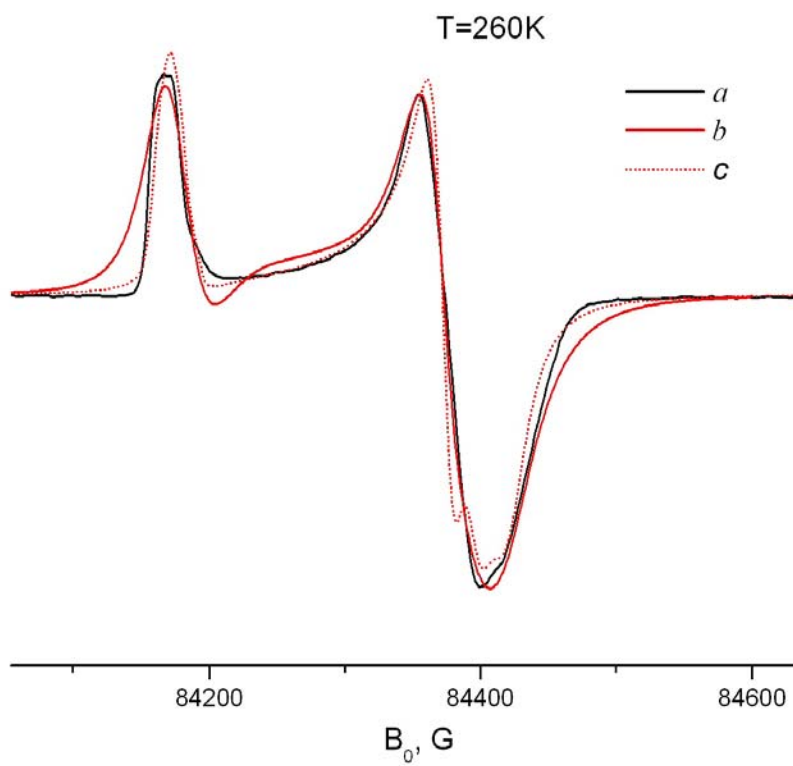

Supplement: b903490k.pdf [file b903490k.pdf]
